# Supplementary material for: Targeted synthesis of ionic liquid-polyoxometalate derived Mo-based electrodes for advanced electrochemical performance
Source: Royal Society of Chemistry journal article supplement (doi:10.1039/c8ta12562g), 2019-01-01
Supplement: c8ta12562g1.pdf [file c8ta12562g1.pdf]

## Electronic Supplementary Information

### Targeted synthesis of ionic liquid-polyoxometalates derived Mo-based electrodes for advanced electrochemical performance

Guojian Chen,<sup>\*a</sup> Lei Zhang,<sup>b</sup> Yadong Zhang,<sup>a</sup> Ke Liu,<sup>a</sup> Zhouyang Long<sup>a</sup> and Ying Wang<sup>\*a</sup>

<sup>a</sup> School of Chemistry and Materials Science, Jiangsu Key Laboratory of Green Synthetic Chemistry for Functional Materials, Jiangsu Normal University, Xuzhou 221116, China

<sup>b</sup> Centre for Clean Environment and Energy, Griffith University, Queensland 4222, Australia

E-mail: gjchen@jsnu.edu.cn (G. Chen); yingwang@jsnu.edu.cn (Y. Wang)

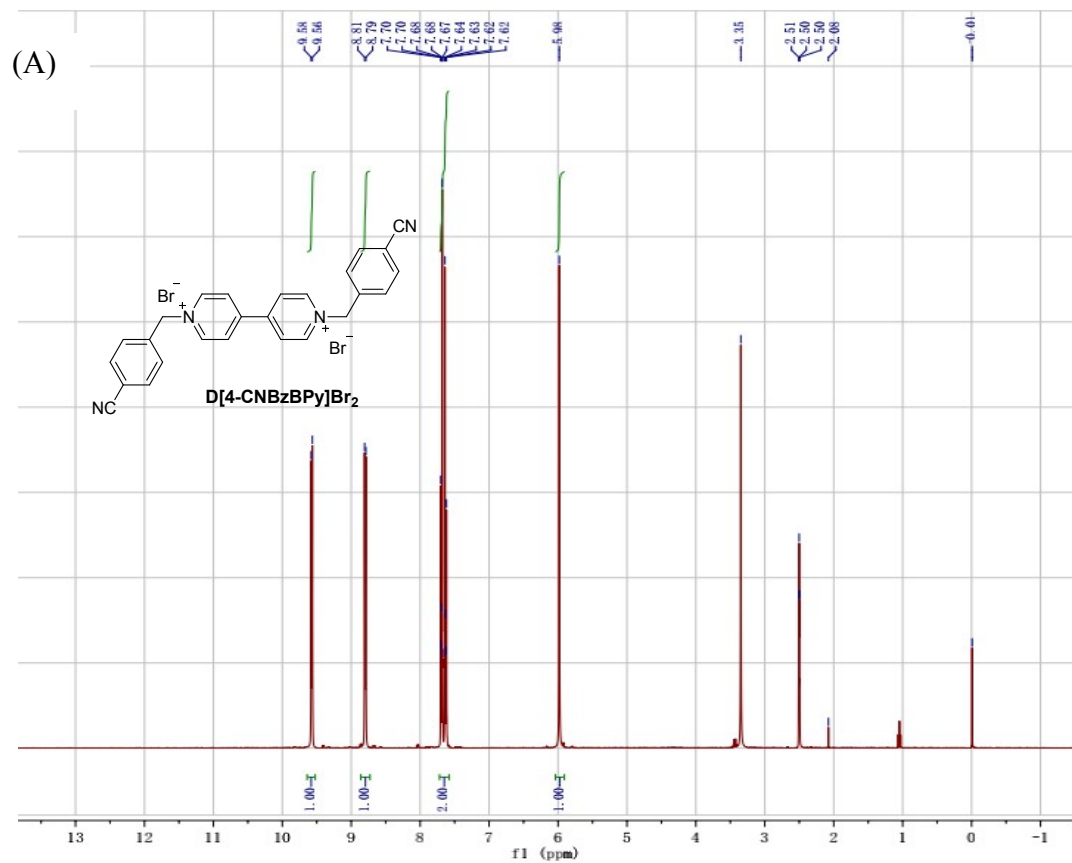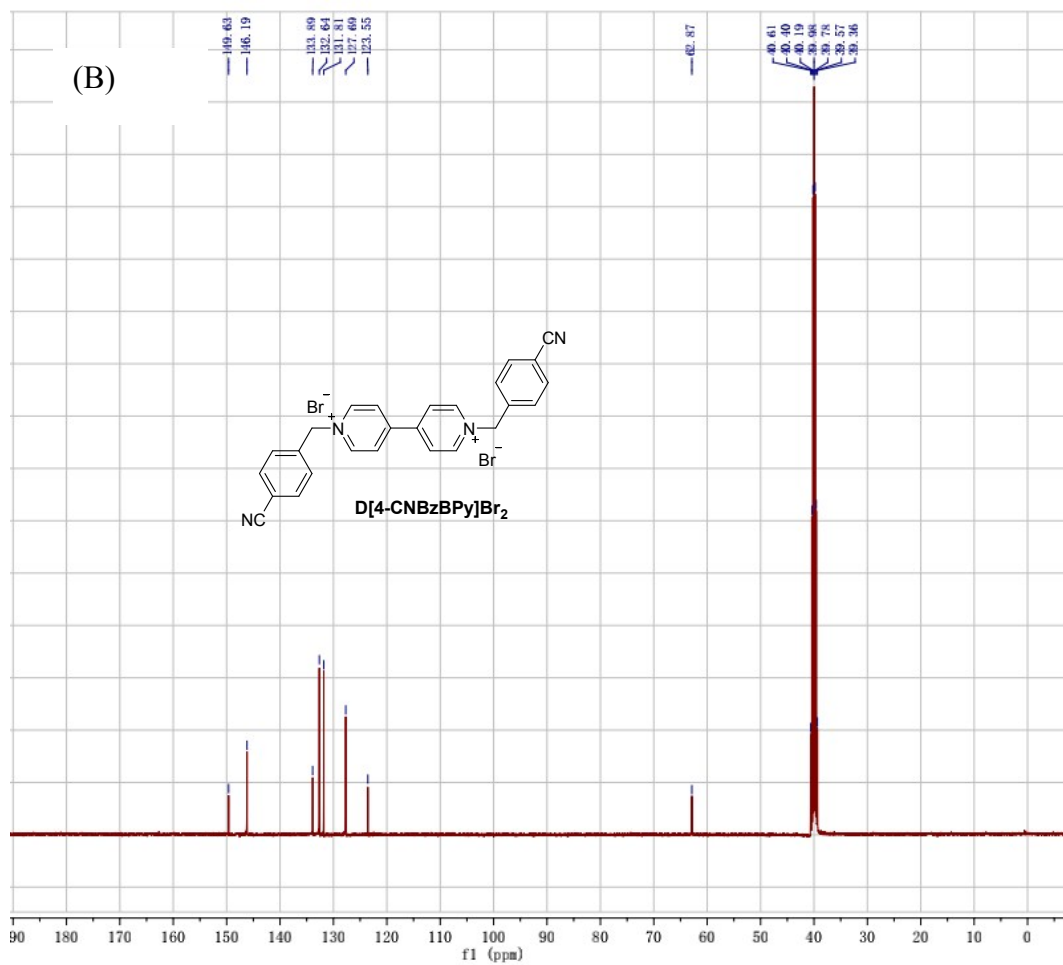

Fig. S1 (A) <sup>1</sup>H NMR and (B) <sup>13</sup>C NMR of D[4-CNzBzBPY]Br<sub>2</sub>.

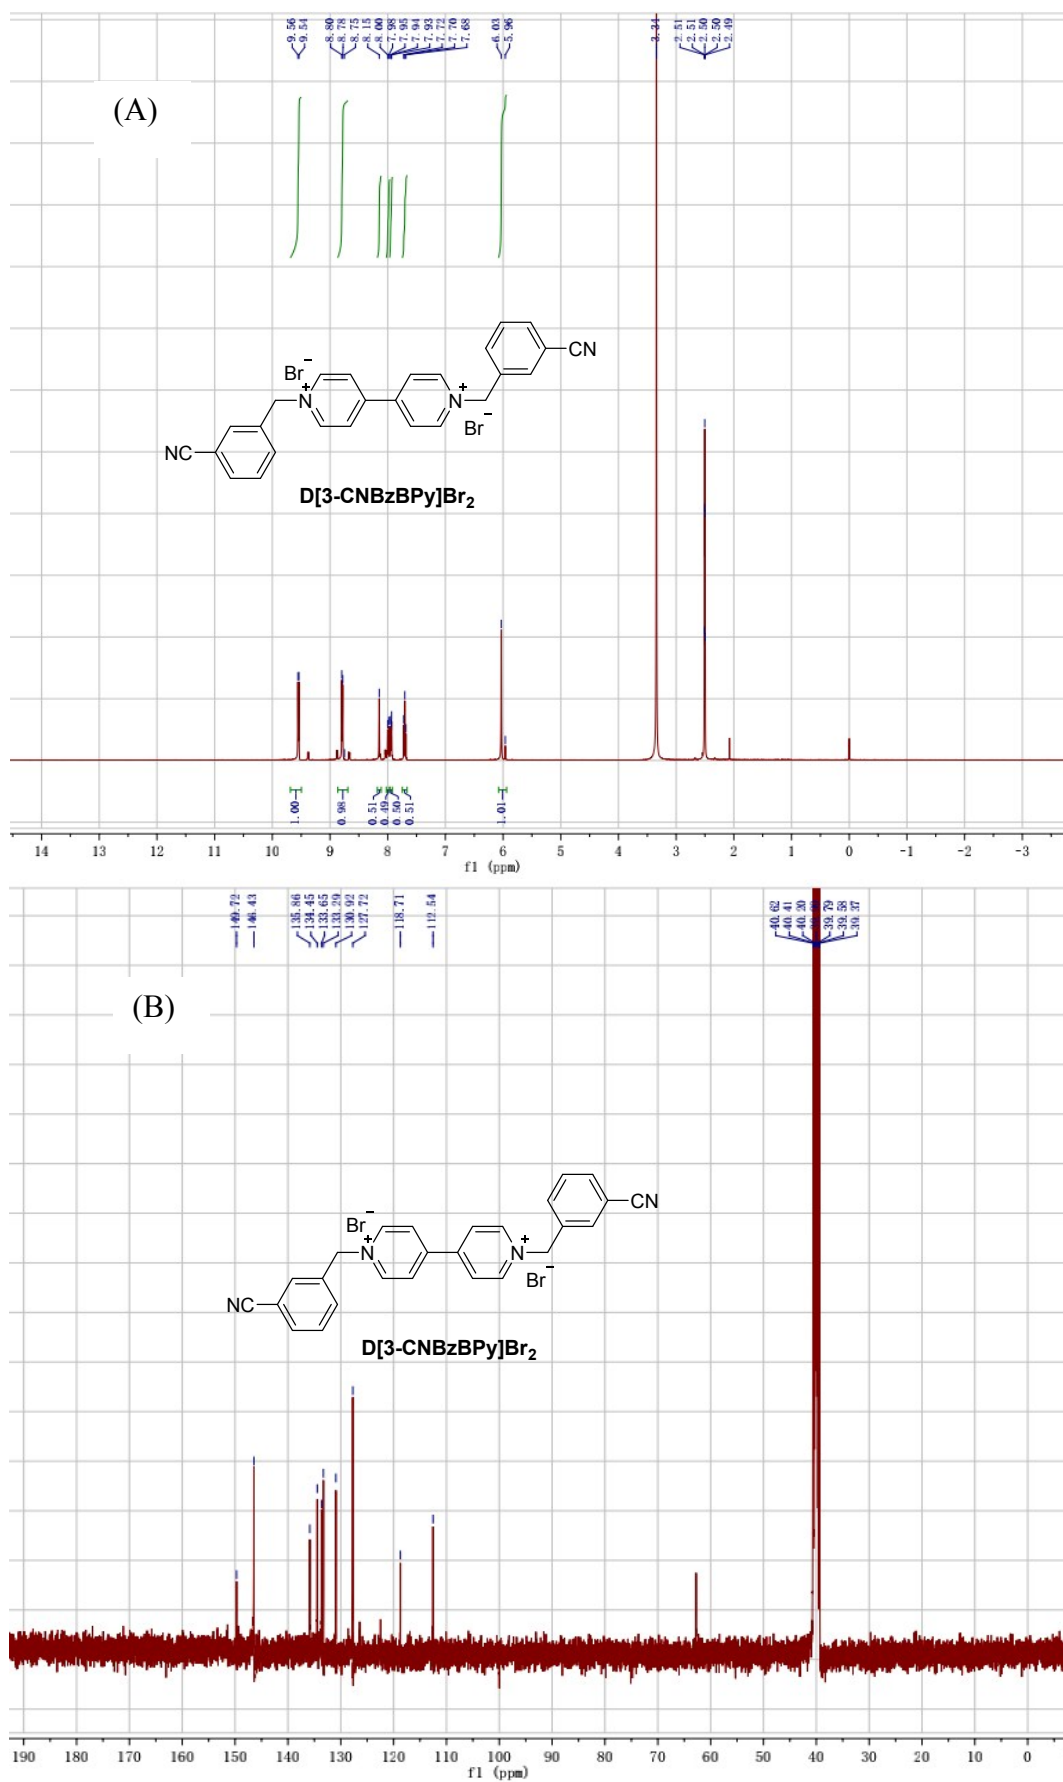

Fig. S2 (A)  $^1\text{H}$ NMR and (B)  $^{13}\text{C}$  NMR of  $\text{D}[3\text{-CNzBPY}]\text{Br}_2$ .

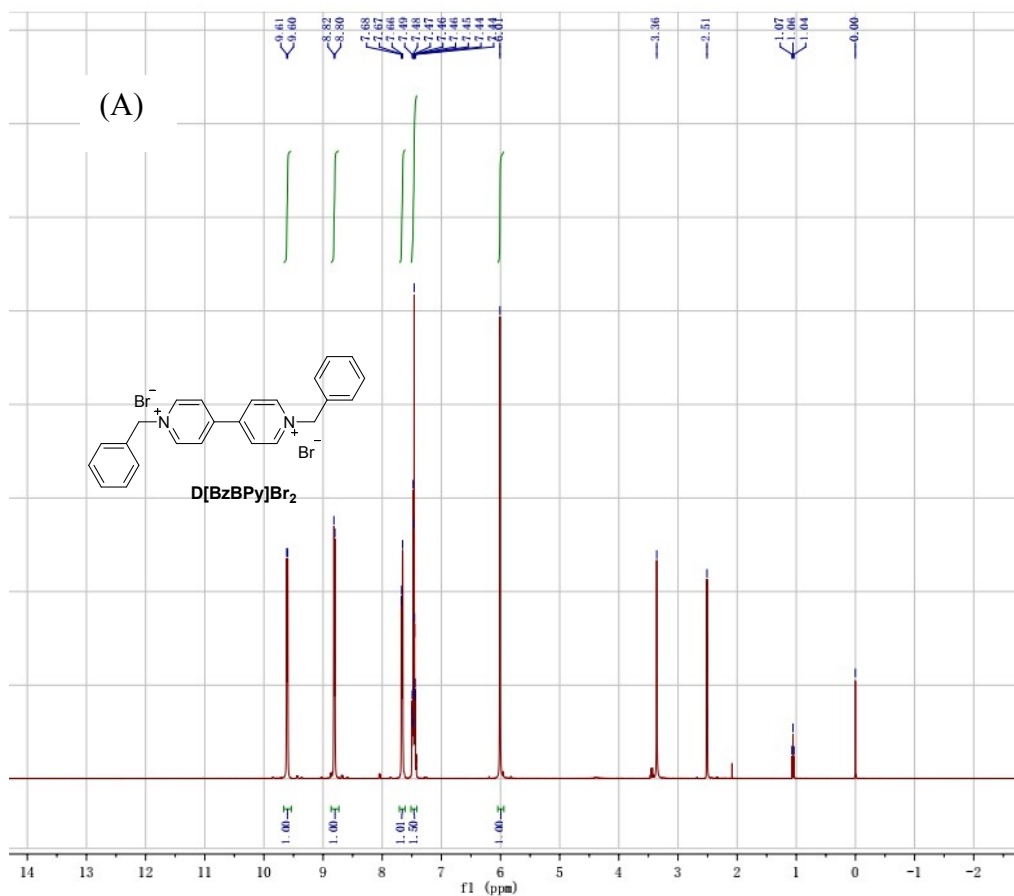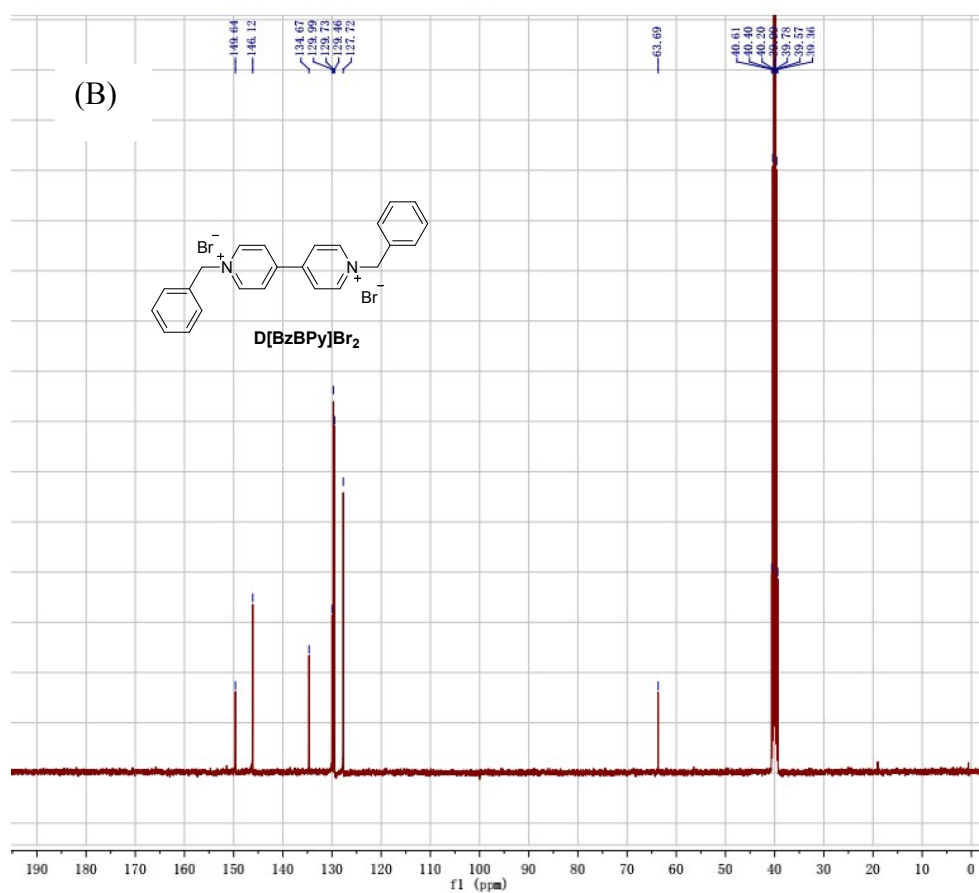

Fig. S3 (A) <sup>1</sup>H NMR and (B) <sup>13</sup>C NMR of D[BzBPy]Br<sub>2</sub>.

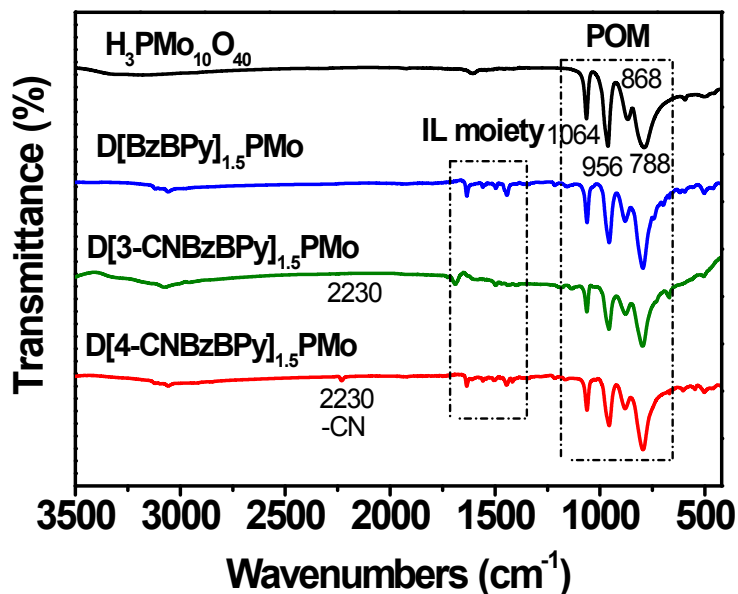

**Fig. S4** FTIR spectra for the IL-POM hybrids and pure  $\text{H}_3\text{PMo}_{12}\text{O}_{40}$ .

Fig. S4 illustrates the FTIR spectra of pure  $\text{H}_3\text{PMo}_{12}\text{O}_{40}$  and the three IL-POM hybrids. Four characteristic vibration bands for Keggin structure of  $\text{PMo}_{12}\text{O}_{40}^{3-}$  anion are observed for  $\text{H}_3\text{PMo}_{12}\text{O}_{40}$  at 1064, 956, 868 and 788  $\text{cm}^{-1}$ , which assigned to the stretching vibration of the central oxygen  $\nu(\text{P}-\text{O}_a)$ , terminal oxygen  $\nu(\text{Mo}=\text{O}_t)$ , inter-octahedral oxygen  $\nu(\text{Mo}-\text{O}_b-\text{Mo})$ , and intra-octahedral oxygen  $\nu(\text{Mo}-\text{O}_c-\text{Mo})$ , respectively. After combined with viologen ionic liquid cations, the four Keggin featured bands for the formed IL-POM hybrids are also observed with only slight shifts, and the peaks located at 1635, 1497, 1445  $\text{cm}^{-1}$  are assigned to the IL cations, and the weak peaks located at 2230  $\text{cm}^{-1}$  reflect the existence of CN groups, indicating that the successful formation of the IL-POM hybrids via strong ionic bond interactions.

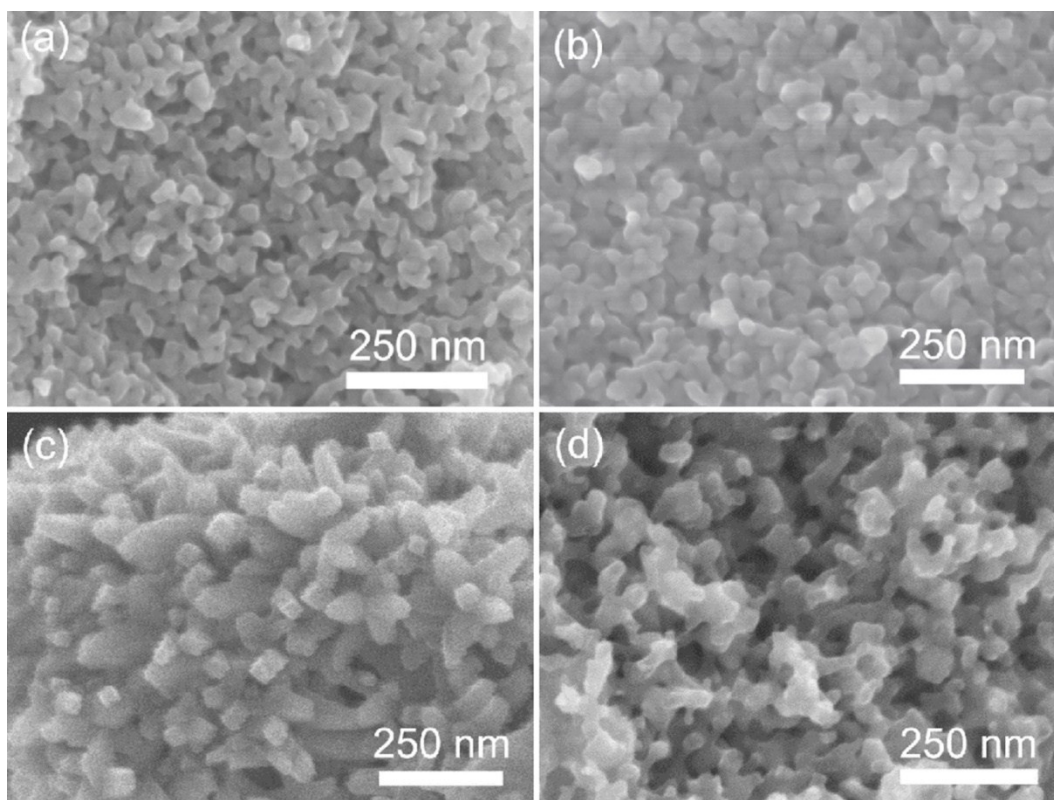

**Fig. S5** SEM images of (a) D[3-CNBzBPY]<sub>1.5</sub>PMo, (b) D[BzBPY]<sub>1.5</sub>PMo, (c) N/P-Mo<sub>2</sub>C@C3 and (d) N/P-MoO<sub>2</sub>@C0.

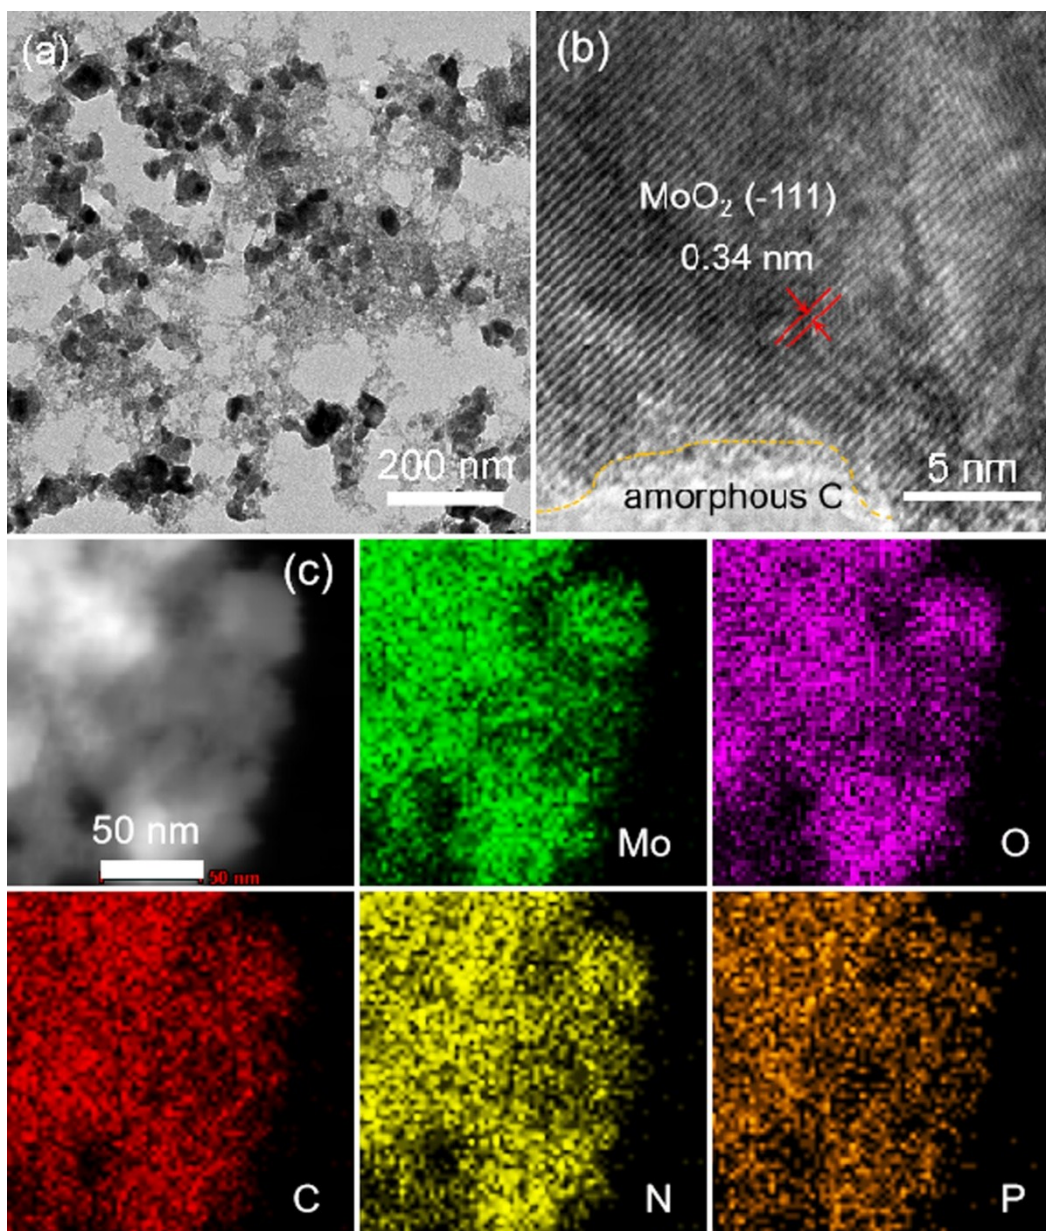

**Fig. S6** (a) TEM image and (b) HR-TEM image of N/P-MoO<sub>2</sub>@C0. (c) STEM EDS elemental mapping of Mo, O, C, N and P in the N/P-MoO<sub>2</sub>@C0 at the nanoscale (50 nm).

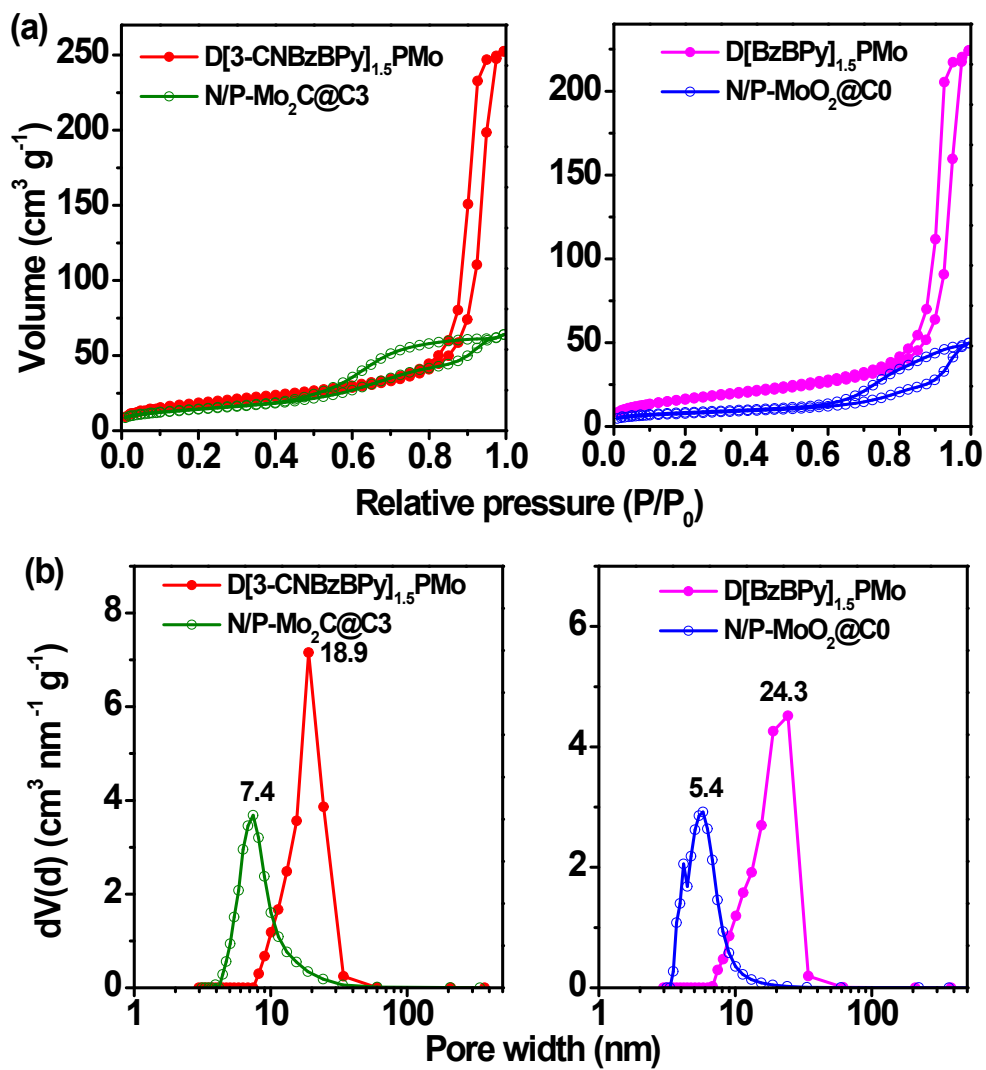

**Fig. S7** (a) N<sub>2</sub> adsorption-desorption isotherms and (b) BJH pore size distributions of IL-POMs and their derived materials.



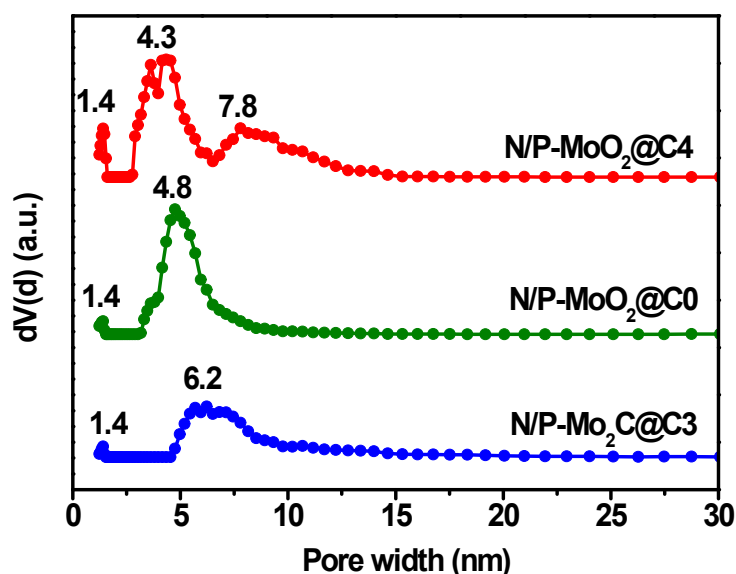

**Fig. S8** Pore size distributions of N/P-MoO<sub>2</sub>@C4, N/P-MoO<sub>2</sub>@C0 and N/P-Mo<sub>2</sub>C@C3 calculated by the non-local density function theory (NLDFT).

In addition, pore size distributions of N/P-MoO<sub>2</sub>@C4, N/P-MoO<sub>2</sub>@C0 and N/P-Mo<sub>2</sub>C@C3 were also calculated by the non-local density function theory (NLDFT). As shown in Fig. S8, a small amount of micropores centred at 1.4 nm appear in the final N/P-MoO<sub>2</sub>@C networks, which is consistent with the results of micropore surface areas (Table S1). The mesopore size distributions described in Fig. S8 have the similar trend with the BJH pore size distributions (Fig. 1g and Fig. S7b).

**Table S1** The textural properties of mesoporous IL-POMs and derived N/P-MoO<sub>2</sub> (or Mo<sub>2</sub>C) @C networks.

| Sample                                | $S_{\text{BET}}$ (m <sup>2</sup> g <sup>-1</sup> ) <sup>a</sup> | $S_{\text{micro}}$ (m <sup>2</sup> g <sup>-1</sup> ) <sup>b</sup> | $V_{\text{total}}$ (cm <sup>3</sup> g <sup>-1</sup> ) <sup>c</sup> | $D_p$ (nm) <sup>d</sup> |
|---------------------------------------|-----------------------------------------------------------------|-------------------------------------------------------------------|--------------------------------------------------------------------|-------------------------|
| D[4-CNBzBPy] <sub>1.5</sub> PMo       | 63                                                              | 11.3                                                              | 0.37                                                               | 19.0                    |
| D[BzBPy] <sub>1.5</sub> PMo           | 60                                                              | 10.7                                                              | 0.35                                                               | 24.3                    |
| D[3-CNBzBPy] <sub>1.5</sub> PMo       | 65                                                              | 10.2                                                              | 0.39                                                               | 18.9                    |
| N/P-MoO <sub>2</sub> @C4              | 89                                                              | 7.8                                                               | 0.16                                                               | 3.5                     |
| N/P-MoO <sub>2</sub> @C0              | 51                                                              | 4.6                                                               | 0.10                                                               | 5.4                     |
| N/P-Mo <sub>2</sub> C@C3 <sup>e</sup> | 28                                                              | 2.7                                                               | 0.08                                                               | 7.5                     |

<sup>a</sup> Surface area calculated using the BET method. <sup>b</sup> Micropore surface area calculated by *t*-plot method. <sup>c</sup> The total pore volume at P/P<sub>0</sub>=0.99. <sup>d</sup> The most probable pore diameter calculated by the BJH method. <sup>e</sup> N/P-Mo<sub>2</sub>C@C3 was prepared by the pyrolysis of D[3-CNBzBPy]<sub>1.5</sub>PMo under the same conditions.

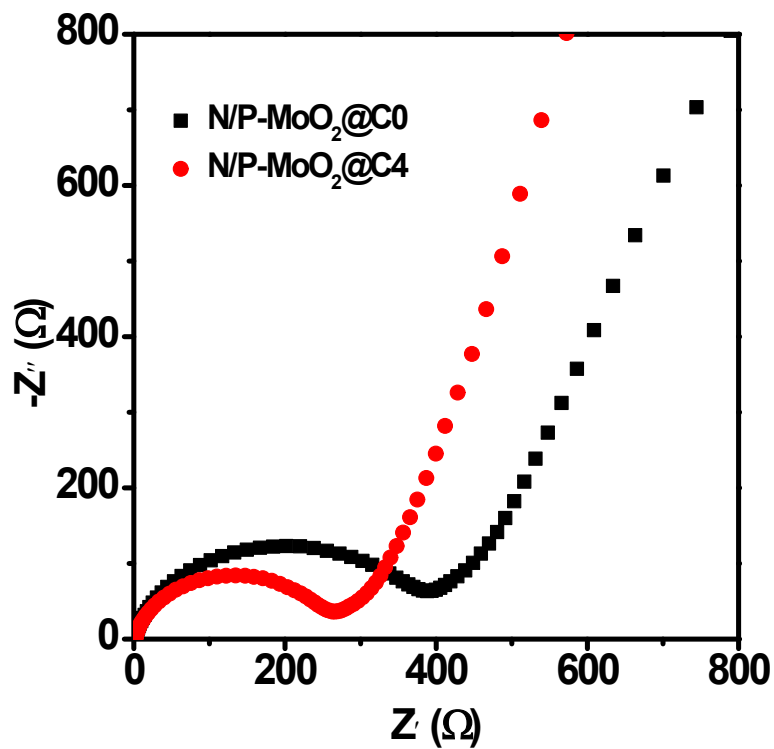

**Fig. S9** Nyquist plot of the N/P-MoO<sub>2</sub>@C0 and N/P-MoO<sub>2</sub>@C4.

The depressed semicircle in Fig. S9 is related to charge transfer resistance of electrode ( $R_{ct}$ ). Apparently, the N/P-MoO<sub>2</sub>@C4 shows a lower  $R_{ct}$ , which will contribute to faster ion/electron transportation. The tightly-packed 3D sponge-like morphology of N/P-MoO<sub>2</sub>@C4 not only provide ion/electron with multiply channels for transportation, but also shorten the transport distance.

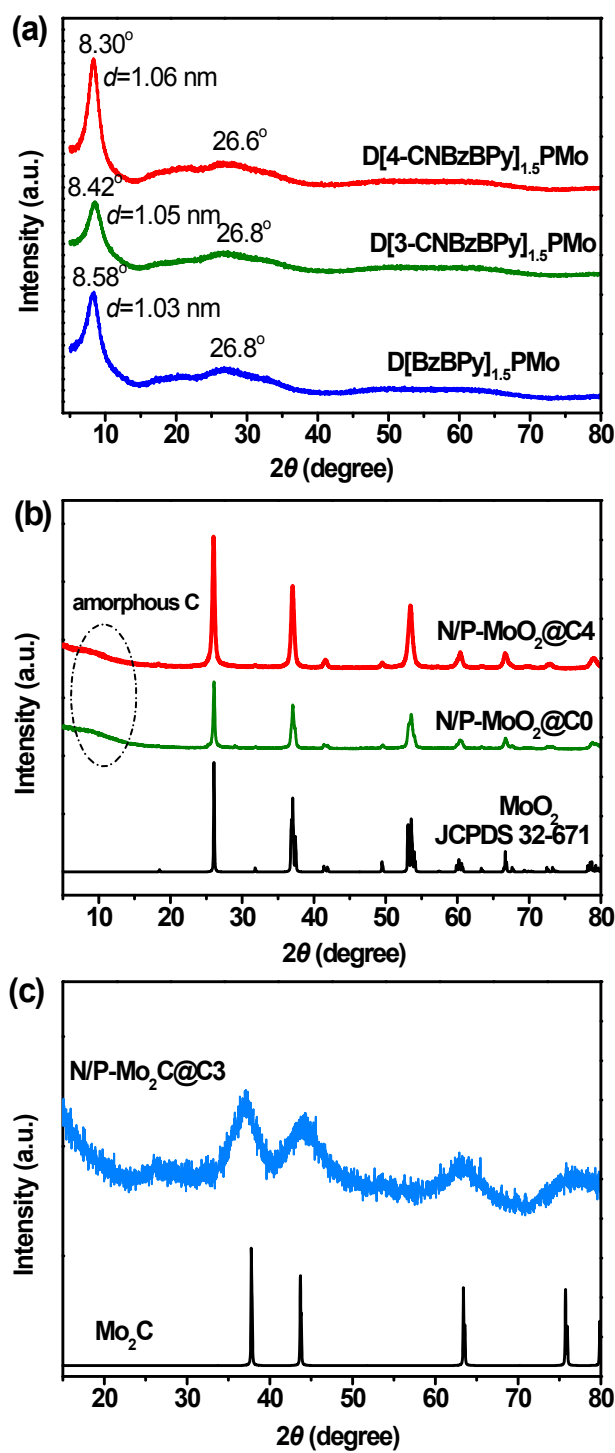

**Fig. S10** XRD patterns of (a) IL-POM precursors D[4-CNzBzBpy]<sub>1.5</sub>PMo, D[3-CNzBzBpy]<sub>1.5</sub>PMo, and D[BzBpy]<sub>1.5</sub>PMo. (b) N/P-MoO<sub>2</sub>@C4 and N/P-MoO<sub>2</sub>@C0. (c) N/P-Mo<sub>2</sub>C@C3.

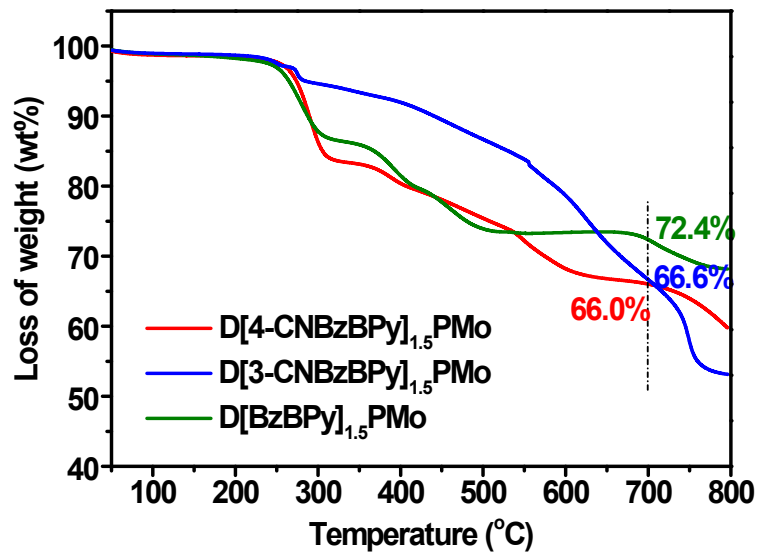

Fig. S11 TGA cures of D[4-CNzBzBPY]<sub>1.5</sub>PMo, D[3-CNzBzBPY]<sub>1.5</sub>PMo and D[BzBPY]<sub>1.5</sub>PMo in N<sub>2</sub>.

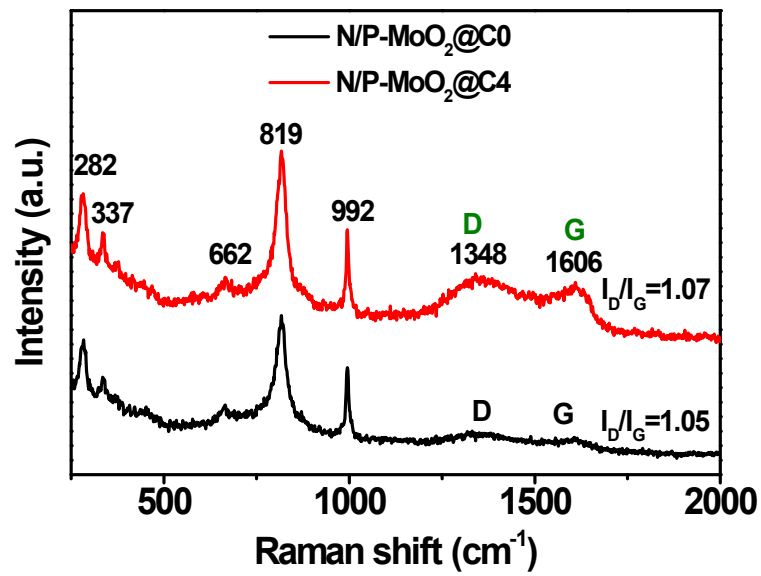

Fig. S12 Raman spectra for N/P-MoO<sub>2</sub>@C0 and N/P-MoO<sub>2</sub>@C4.

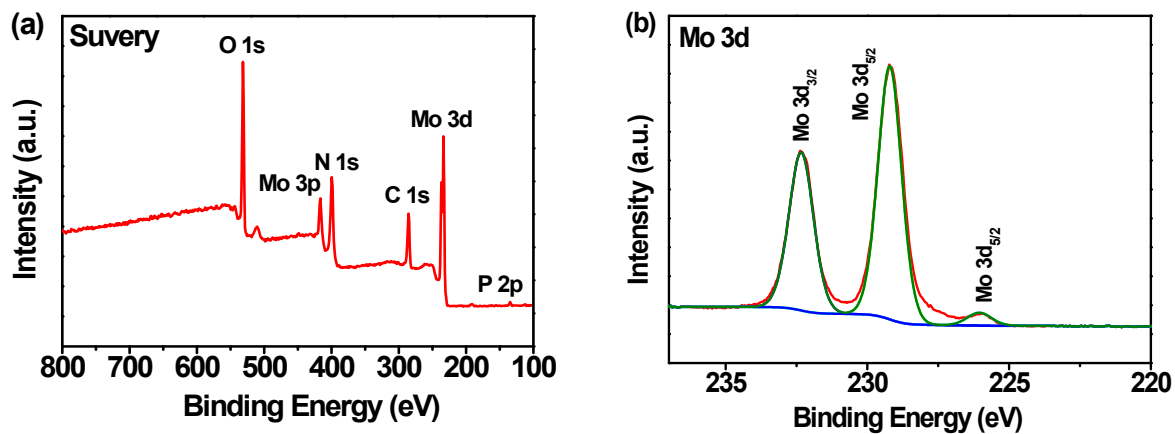

Fig. S13 (a) Wide-scan survey XPS spectrum of N/P-MoO<sub>2</sub>@C4. (b) Mo 3d XPS spectra.

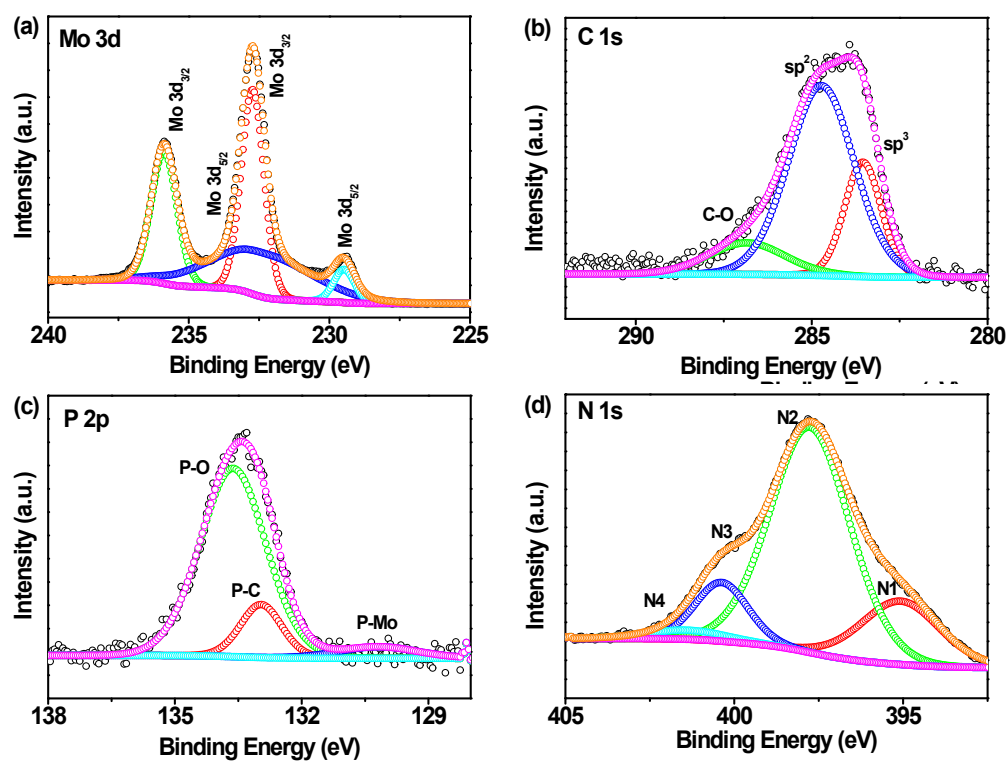

Fig. S14 High-resolution XPS spectra of (a) Mo 3d, (b) N 1s, (c) C 1s and (d) P 2p of N/P-MoO<sub>2</sub>@C0.

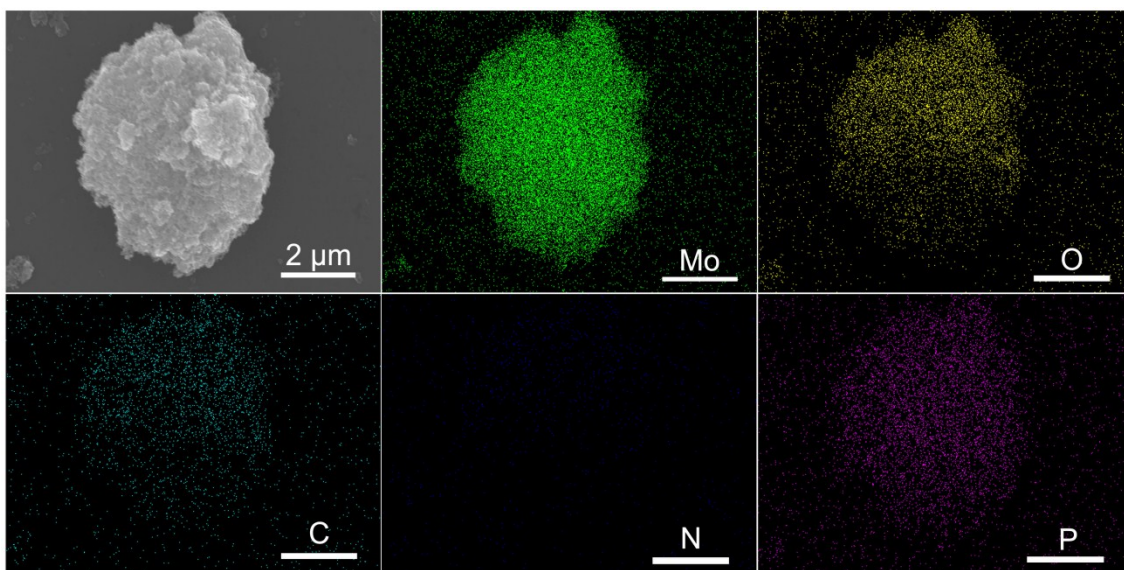

**Fig. S15** SEM EDS mapping images of N/P-MoO<sub>2</sub>@C4 for the elements Mo, O, C, N and P at the micrometer scale.

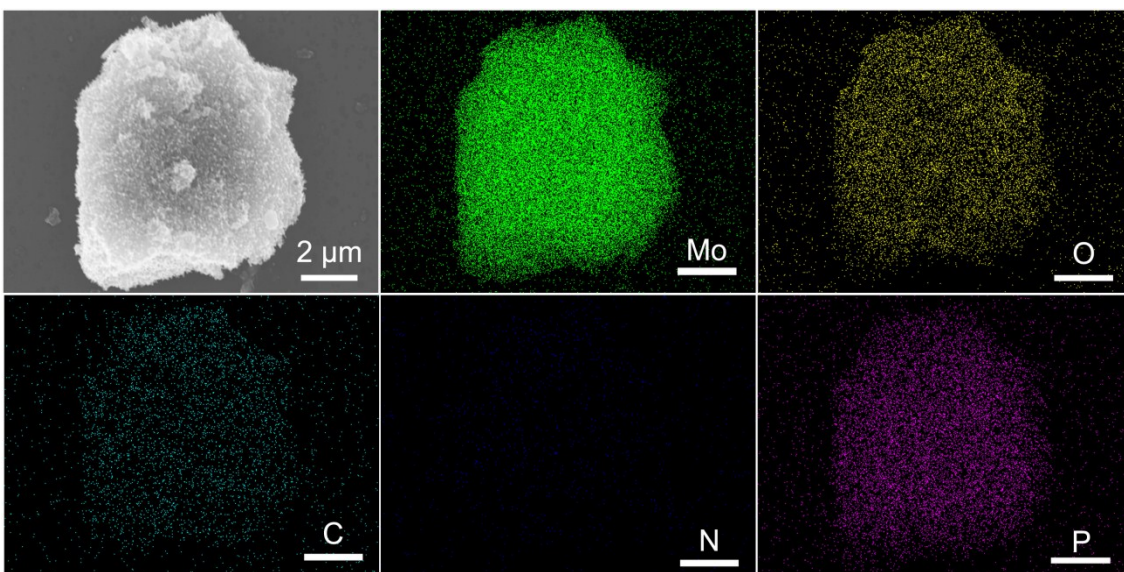

**Fig. S16** SEM EDS mapping images of N/P-MoO<sub>2</sub>@C0 for the elements Mo, O, C, N and P at the micrometer scale.

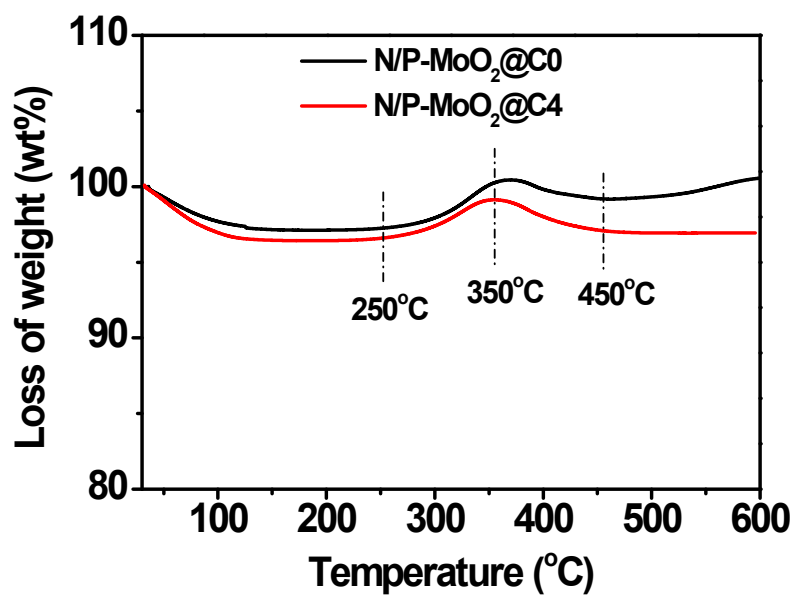

**Fig. S17** TGA cures of N/P-MoO<sub>2</sub>@C0 and N/P-MoO<sub>2</sub>@C4 in air.

As shown in Fig. S17, the slight weight loss before 220 °C is likely caused by desorption of water or gas molecules. The successive weight gain and loss between 250-450 °C is caused by the simultaneous oxidation of MoO<sub>2</sub> to MoO<sub>3</sub> and the combustion of carbon, nitrogen and phosphorus under an air atmosphere.

**Table S2** Elemental compositions of N/P-MoO<sub>2</sub>@C0 and N/P-MoO<sub>2</sub>@C4.

| Sample                   | MoO <sub>2</sub> (wt%) <sup>a</sup> | C (wt%) <sup>b</sup> | N (wt%) <sup>b</sup> | P (wt%) <sup>c</sup> |
|--------------------------|-------------------------------------|----------------------|----------------------|----------------------|
| N/P-MoO <sub>2</sub> @C4 | 86.1                                | 5.2                  | 1.8                  | 6.9                  |
| N/P-MoO <sub>2</sub> @C0 | 88.2                                | 3.9                  | 1.1                  | 6.8                  |

<sup>a</sup> The content of MoO<sub>2</sub> is calculated based on the TGA results collected in air. <sup>b</sup> The C and N content in each sample is obtained based on elemental analysis. <sup>c</sup> The P content is calculated based on  $(100 - \text{wt}_{\text{MoO}_2} - \text{wt}_{\text{C}} - \text{wt}_{\text{N}})\%$ .

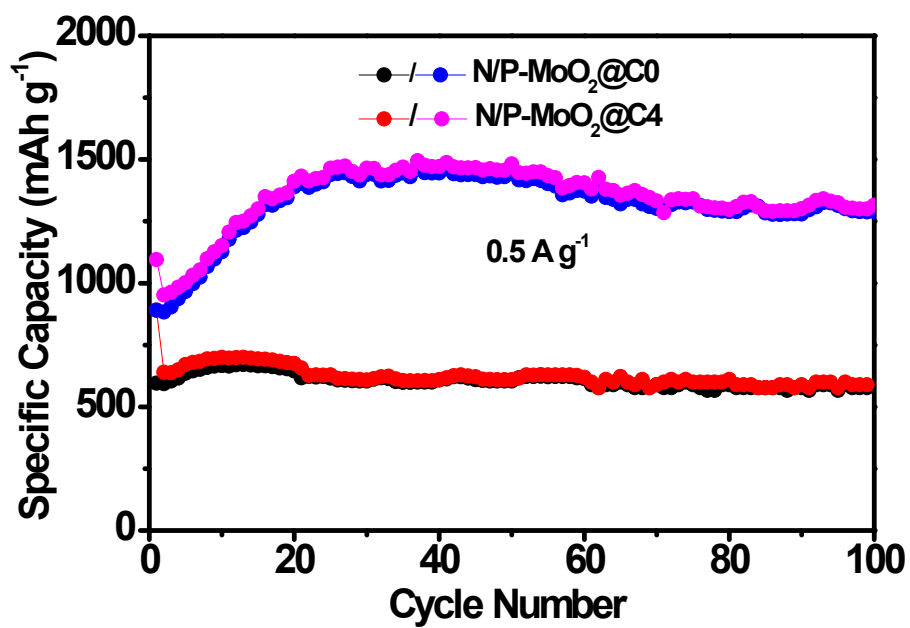

Fig. S18 Cycling performance of N/P-MoO<sub>2</sub>@C0 and N/P-MoO<sub>2</sub>@C4 at 0.5 A g<sup>-1</sup>.



**Table S3.** Comparisons of lithium storage performance of different MoO<sub>2</sub>-based and other Mo-based electrodes.

| Samples                                          | Current density<br>(A g <sup>-1</sup> ) | Capacity<br>(mAh g <sup>-1</sup> ) | Cycle | Ref.      |
|--------------------------------------------------|-----------------------------------------|------------------------------------|-------|-----------|
| Triple shelled MoO <sub>2</sub> /C               | 0.5                                     | 580                                | 200   | S1        |
| Mesoporous carbon-MoO <sub>2</sub>               | 0.084                                   | 581                                | 30    | S2        |
| MoO <sub>2</sub> -Graphene                       | 1.0                                     | 600                                | 70    | S3        |
| MoO <sub>2</sub> @N-doped carbon                 | 0.5                                     | 700                                | 100   | S4        |
| 3D MoO <sub>2</sub>                              | 1.0                                     | 650                                | 100   | S5        |
| Ultrathin 2D MoO <sub>2</sub>                    | 1.0                                     | 489                                | 1050  | S6        |
| MoO <sub>2</sub> /C                              | 1.6                                     | 650                                | 1000  | S7        |
| MoO <sub>2</sub> flowers on graphene             | 0.38                                    | 477.2                              | 100   | S8        |
| MoO <sub>2</sub> @C nanorod                      | 10                                      | 312                                | 268   | S9        |
| MoO <sub>2</sub> -N,S doped graphene             | 0.2                                     | 1250                               | 100   | S10       |
| MoS <sub>2</sub> -graphene sheet                 | 0.1                                     | 1077                               | 150   | S11       |
| Freestanding MoO <sub>2</sub> /Mo <sub>2</sub> C | 0.1                                     | 1103                               | 50    | S12       |
| MoS <sub>2</sub> -MoO <sub>2</sub>               | 10                                      | 295                                | 300   | S13       |
| Core-shell TiO <sub>2</sub> @MoO <sub>2</sub>    | 0.5                                     | 390                                | 450   | S14       |
| TiO <sub>2</sub> @MoO <sub>2</sub> -C            | 10                                      | 60                                 | 1000  | S15       |
| MoS <sub>2</sub> -MoSe <sub>2</sub>              | 0.2                                     | 676                                | 200   | S16       |
| MoS <sub>2</sub> @CNT                            | 0.2                                     | 747                                | 200   | S17       |
| MoS <sub>2</sub> -rGO/HCS                        | 2.0                                     | 753                                | 1000  | S18       |
| Mo <sub>x</sub> C@N-C                            | 0.5                                     | 521                                | 200   | S19       |
| TiO <sub>2</sub> @NC@MoS <sub>2</sub>            | 1.0                                     | 590                                | 200   | S20       |
| N/P-MoO <sub>2</sub> @C4                         | 0.5                                     | 1381                               | 100   | This work |
|                                                  | 20                                      | 346                                | 5000  |           |

## Reference

- [S1] Y. Wang, L. Yu and X. W. Lou, *Angew. Chem. Int. Ed.*, 2016, **55**, 14668-14672.
- [S2] Y. Zhou, I. Lee, C. W. Lee, H. S. Park, H. Son and S. Yoon, *B. Korean Chem. Soc.*, 2014, **35**, 257-260.
- [S3] Y. Sun, X. Hu, W. Luo and Y. Huang, *ACS Nano*, 2011, **5**, 7100-7107.
- [S4] X. Tan, C. Cui, S. Wu, B. Qiu, L. Wang and J. Zhang, *Chem. Asian J.*, 2017, **12**, 36-40.
- [S5] G. Xu, P. Liu, Y. Ren, X. Huang, Z. Peng, Y. Tang and H. Wang, *J. Power Sources*, 2017, **361**, 1-8.
- [S6] C. Xia, Y. Zhou, D. B. Velusamy, A. A. Farah, P. Li, Q. Jiang, I. N. Odeh, Z. Wang, X. Zhang and H. N. Alshareef, *Nano Lett.*, 2018, **18**, 1506-1515.
- [S7] L. Chen, H. Jiang, H. Jiang, H. Zhang, S. Guo, Y. Hu and C. Li, *Adv. Energy Mater.*, 2017, **7**, 1602782.
- [S8] Y. Zhou, H. Xie, C. Wang, Q. He, Q. Liu, Z. Muhammad, Y. A. Hgeem, Y. Sang, S. Chen and L. Song, *J. Phys. Chem. C*, 2017, **121**, 15589-15596.
- [S9] Y. Wang, Z. Huang and Y. Wang, *J. Mater. Chem. A*, 2015, **3**, 21314-21320.
- [S10] J. Pei, H. Geng, H. Ang, L. Zhang, H. Wei, X. Cao, J. Zheng and H. Gu, *Nanotechnology*, 2018, **29**, 295404.
- [S11] Y. Teng, H. Zhao, Z. Zhang, Z. Li, Q. Xia, Y. Zhang, L. Zhao, X. Du, Z. Du, P. Lv and K. Świerczek, *ACS Nano*, 2016, **10**, 8526-8535.
- [S12] H. Li, H. Ye, Z. Xu, C. Wang, J. Yin and H. Zhu, *Phys. Chem. Chem. Phys.*, 2017, **19**, 2908-2914.
- [S13] D. Xiao, J. Zhang, X. Li, D. Zhao, H. Huang, J. Huang, D. Cao, Z. Li and C. Niu, *ACS Nano*, 2016, **10**, 9509-9515.
- [S14] S. Wang, Z. Zhang, Y. Yang and Z. Tang, *ACS Appl. Mater. Interfaces*, 2017, **9**, 23741-23747.
- [S15] C. Zhao, C. Yu, M. Zhang, H. Huang, S. Li, X. Han, Z. Liu, J. Yang, W. Xiao, J. Liang, X. Sun and J. Qiu, *Adv. Energy Mater.*, 2017, **7**, 1602880.
- [S16] J. Yang, J. Zhu, J. Xu, C. Zhang and T. Liu, *ACS Appl. Mater. Interfaces*, 2017, **9**, 44550-44559.
- [S17] H. Zhou, R. Zhang, S. Song, C. Xiao, G. Gao and S. Ding, *ACS Appl. Energy Mater.*, 2018, **1**, 5112-5118.
- [S18] X. Hu, Y. Li, G. Zeng, J. Jia, H. Zhan and Z. Wen, *ACS Nano*, 2018, **12**, 1592-1602.
- [S19] S. Liu, F. Li, D. Wang, C. Huang, Y. Zhao, J.-B. Baek and J. Xu, *Small Meth.*, 2018, **2**, 1800040.
- [S20] S. Wang, B. Y. Guan, L. Yu and X. W. Lou, *Adv. Mater.*, 2017, **29**, 1702724.
